# Supplementary material for: Development of Multiplex RT-PCR Assay for the Simultaneous Detection of Four Systemic Diseases Infecting Citrus
Source: MDPI journal article supplement (doi:10.3390/agriculture13061227), 2023-06-10
Supplement: s1 [file s1]

Archive with 3 entries (3 files):
- Figure S1.pdf
- Figure S2.pdf
- Table S1.pdf
