# Supplementary material for: Development of Multiplex RT-PCR Assay for the Simultaneous Detection of Four Systemic Diseases Infecting Citrus
Source: MDPI journal article supplement (doi:10.3390/agriculture13061227), 2023-06-10
Supplement: s1 [file s1 › Figure S1.pdf]

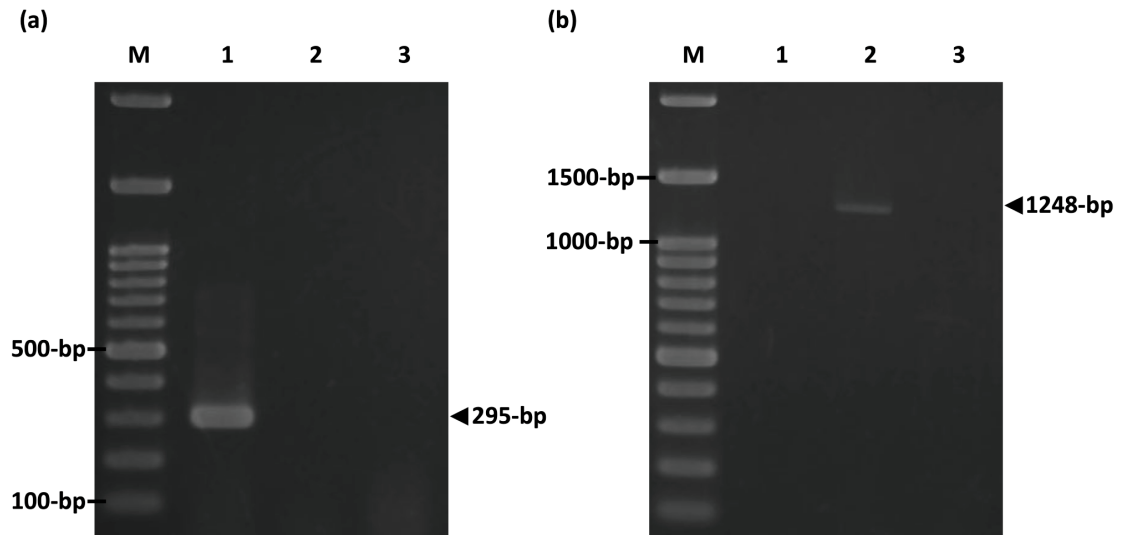

**Figure S1. An additional test of specificity of the newly designed primer pair for *Candidatus Liberibacter asiaticus* (CLas).** (a) PCR assay with primer pair CLas-295F/R. (b) The nested PCR with universal primer pair P1/16S-Sr followed by the nested primer pair R16F2n/R16R2. Lane 1: CLas-infected Wentan pomelo; lane 2: Taiwan citrus symptomless (TCS) phytoplasma (16SrII)-infected Wentan pomelo; lane 3: healthy Wentan pomelo. M, 100 bp DNA ladder (GeneDireX).
