# Supplementary material for: Development of Multiplex RT-PCR Assay for the Simultaneous Detection of Four Systemic Diseases Infecting Citrus
Source: MDPI journal article supplement (doi:10.3390/agriculture13061227), 2023-06-10
Supplement: s1 [file s1 › Figure S2.pdf]

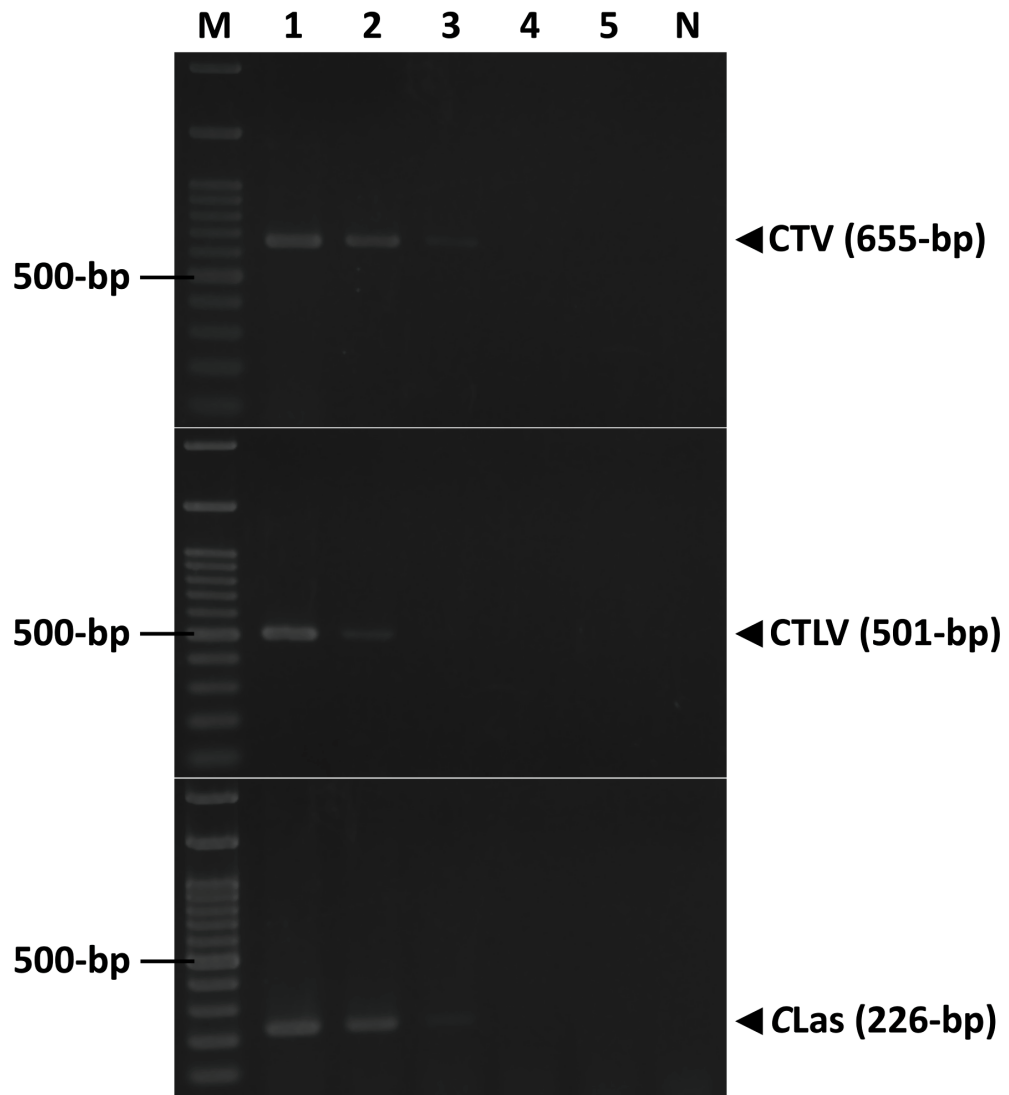

**Figure S2. Sensitivities of compared simplex (RT-) PCR for citrus tristeza virus (CTV), citrus tatter leaf virus (CTLV) and *Candidatus* Liberibacter asiaticus (CLas) using 10-fold serial dilutions of total nucleic acids from infected plants.** These methods were described by [22], [23] and [21], respectively. Lane 1:  $10^0$ ; lane 2:  $10^{-1}$ ; lane 3:  $10^{-2}$ ; lane 4:  $10^{-3}$ ; lane 5:  $10^{-4}$ ; N, negative control (ddH<sub>2</sub>O.)
