# Supplementary material for: Development of Multiplex RT-PCR Assay for the Simultaneous Detection of Four Systemic Diseases Infecting Citrus
Source: MDPI journal article supplement (doi:10.3390/agriculture13061227), 2023-06-10
Supplement: s1 [file s1 › Table S1.pdf]

**Table S1. The sequences and alignments of amplified products.**

| <b>Amplicon name</b> | <b>Sequence</b>                                                                                                                                                                                                                                                                                                                                                                                                                                                                                                  | <b>Alignment (Accession No.)</b>                                             | <b>Identity</b> |
|----------------------|------------------------------------------------------------------------------------------------------------------------------------------------------------------------------------------------------------------------------------------------------------------------------------------------------------------------------------------------------------------------------------------------------------------------------------------------------------------------------------------------------------------|------------------------------------------------------------------------------|-----------------|
| Las295               | CGGATGTTCCAAGGGGTAGGGTTGTTTGTGCTCCTGGTTCGATTCAAGAGTATTCTAGGTTTAGGG<br>CGAGTGTTTATATTCTGACAGCTAGTGAAGGTGGTCGTACTACAGGATTTATGGATAATTATCGCC<br>CACAGTTCCTTTATGGATACGGCGGATGTTACGGGAAGGATCATTCTGAGTCCTGGATCTCAAGCGG<br>TAATGCCTGGTGATAGGGTGGATTTAGAGGTAGAACTTATTTATCCAATTGCGATGGAGCCAAATC<br>AGACTTTTTCTATGCGTGAAGGAGGAAAGAC                                                                                                                                                                                         | <i>Candidatus</i><br><i>Liberibacter</i><br><i>asiaticus</i><br>(CP010804.2) | 100%            |
| CTV468               | GGTTACGAGGAAGCAACCGAGCTTCTTAACTTACGCGATTTGGGAAGGTATTTGTAGTTAGTTTGC<br>GGGCGGTGGTTTTACGCCATCCCATGAGCACTGCTTTAAGGGTCGTTAATTGACGACTCTTGATAT<br>TTACTAAGTTTGAGTTATGGACGACGAGACAAAGAAATTGAAGAACAAAAACAAGGAAACGAAAGA<br>AGGCGACGATGTTGTTGCAGCGGAGTCTTCTTTTCGGTTCCTTAACTTACACATCGATCCGACTCT<br>GATAGCGATGAATGATGTGCGTCAGTTAGGTACCCAACAGAACGCCGCTTTGAACAGAGATTTGTT<br>CCTTACTTTGAAAGGGAAGTATCCTAATTTGTCTGATAAAGATAAGGACTTTCACATAGCTATGAT<br>GTTGTATCGTTTAGCGGTTAAGAGTTCATCATTGCAAAGTGATGACGACACCACGGGCATAACGTA<br>CACTCG | <i>Citrus tristeza</i><br><i>virus</i><br>(JQ911664.1)                       | 98.7%           |
| CTLV120              | GGAGTCGTTTAAATTCGCAAACCTTGGTCGCGGTCTTGCAGGTTGACATGCCTGCCTTTTACTT<br>AAATAAAGGGTTCCCCCGGTTTTCTGTGCATTTCCGGGTAGTGTGGTTTTTCT                                                                                                                                                                                                                                                                                                                                                                                        | <i>Citrus tatter leaf</i><br><i>virus</i><br>(MH108983.1)                    | 100%            |
| CEVd196              | TTTCGCTGCTGGCTCCACATCCGATCGTCGCTGAAGCGCCACGCCCCCTCGCCCGGAGCTTCTCTC<br>TGGCTACTACCCGGTGGATACAACCTGAAGCTTCAACCCCAAACCGCTTTTCTTATATCTTCACTGC<br>TCTCCGGGCGAGGGTGAAAGCCCTCGGAACCCTAGATTGGGTCCCTCGGGATCTTTCTTGAGGT                                                                                                                                                                                                                                                                                                    | <i>Citrus exocortis</i><br><i>viroid</i><br>(KF973205.1)                     | 100%            |
